# Supplementary material
Source: PubMed Central journal article supplement (PMC3666637)
Supplement: mt201341x1.pdf [file mt201341x1.pdf]

## Supplementary data

**Supplementary Figure 1.KBMA *P. aeruginosa* deliver OVA to BMDCs, where the antigen is loaded into the MHC class I pathway.** BMDCs were incubated for 3 h with *P. aeruginosa* expressing S54-OVA without PCT or with PCT plus 0 or 10  $\mu\text{M}$  of amotosalen. Ten bacteria/ml of HK S54-OVA bacteria was used as a control. DCs were then incubated with gentamicin (250 $\mu\text{g}/\text{ml}$ ) to eliminate the bacteria. Presentation of the SIINFEKL epitope on MHC class I molecules was examined by co-incubation with B3Z T cell hybridomas and measurement of  $\beta$ -galactosidase production after 16 h. The absorbance of HK S54-OVA was set to 1. The vertical axis shows the relative value per pEiS54-OVA bacterium ( $5 \times 10^5$  bacteria). The results are presented as the means + s.d. of triplicate wells. This experiment was repeated twice with similar results.

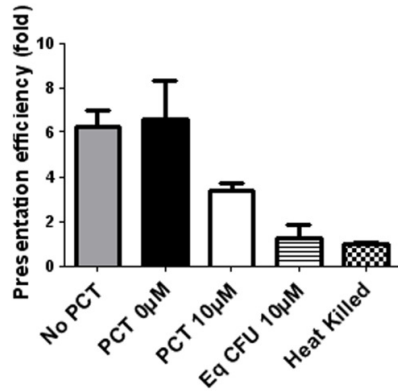

**Supplementary Table 1. Bacterial strains, plasmids, cell lines and mice used in this study.**

| Name                        | Relevant characteristics/sequence                                                                | Source or reference |
|-----------------------------|--------------------------------------------------------------------------------------------------|---------------------|
| <b>Bacterial Strains</b>    |                                                                                                  |                     |
| CHA                         | Wild type, mucoid CF isolate from CHU Grenoble                                                   | 44                  |
| OST                         | Deleted for Exotoxins S and T                                                                    | 21, 37              |
| OSTABGmlox                  | OST <i>uvrA::lox uvrB::Gmlox</i> , Gm <sup>R</sup> susceptible to photochemical treatment        | This work           |
| OSTAB                       | OST <i>uvrA::lox uvrB::lox</i> , susceptible to photochemical treatment                          | This work           |
| OSTAB $\Delta$ <i>popBD</i> | OSTAB <i>popBD::Gmlox</i>                                                                        | This work           |
| OST S54-OVA                 | OST transformed with pEiS54 OVA <sub>248-376</sub> , Cb <sup>R</sup>                             | 10                  |
| OSTAB S54-OVA               | OSTAB transformed with pEiS54 OVA <sub>248-376</sub> , Cb <sup>R</sup>                           | This work           |
| OSTAB S54-M1                | OSTAB transformed with pEiS54 M <sub>1</sub> -K <sub>252</sub> , Cb <sup>R</sup>                 | This work           |
| OSTAB S54-Ei                | OSTAB transformed with empty pEiS54                                                              | This work           |
| <b>Plasmids</b>             |                                                                                                  |                     |
| pEiS54                      |                                                                                                  | 9                   |
| pEiS54-OVA                  | Chicken Ovalbumin (D <sub>248</sub> -A <sub>376</sub> ) fused to ExoS <sub>1-54</sub>            | 10                  |
| pEiS54-M1                   | M1 Flu Puerto Rico Full length (M <sub>1</sub> -K <sub>252</sub> ) fused to ExoS <sub>1-54</sub> | This work           |
| pEiS0-OVA                   | Chicken Ovalbumin (D <sub>248</sub> -A <sub>376</sub> ) without secretion tag                    | 16                  |
| pEX100TuvrA::Gm             | <i>uvrA</i> up and down fragment amplified with primers F and R                                  | This work           |
| pEX100TuvrB::Gm             | <i>uvrB</i> up and down fragment amplified with primers F and R                                  | This work           |



**Supplementary Table 2. Primers used in this study.**

| Primer name                                              | Sequence 5' to 3'              | Restriction site |
|----------------------------------------------------------|--------------------------------|------------------|
| Deletion of <i>uvrA</i>                                  |                                |                  |
| UvrA Up-F                                                | CTGAATTCGGCCCCCCTCGTGCACCAGT   | <i>EcoRI</i>     |
| UvrA Up-R                                                | GTAAGCTTGCGCCCCACGAATCAGGATC   | <i>HindIII</i>   |
| UvrA Down-F                                              | GTAAGCTTGCCGAGATGCCCCAGTCGCA   | <i>HindIII</i>   |
| UvrA Down-R                                              | CTGAATTCGGCGGACCACTGG          | <i>EcoRI</i>     |
| Deletion of <i>uvrB</i>                                  |                                |                  |
| UvrB Up-F                                                | GAATTCGCGCAGCGTCGGATCT         | <i>EcoRI</i>     |
| UvrB Up-R                                                | AAGCTTCATCGAGCAGGTGGTGCG       | <i>HindIII</i>   |
| UvrB Down-F                                              | AAGCTTGTTGTTGTTGCGCAGGTA       | <i>HindIII</i>   |
| UvrB Down-R                                              | GGATCCTTGGCGTCACAGCTCC         | <i>BamHI</i>     |
| External primer                                          |                                |                  |
| UvrA-F                                                   | CCTCATGGAAGAAACCGCTG           |                  |
| UvrA-R                                                   | GATCACATAAGCACCAAGCG           |                  |
| UvrB-F                                                   | AGGGTAGTCACCAGCACCC            |                  |
| UvrB-R                                                   | GATGTGATCGACATCTTCCC           |                  |
| Influenza M1 (M <sub>1</sub> -K <sub>252</sub> ) cloning |                                |                  |
| M1 <i>AgeI</i> -F                                        | CCACCGGTAGTCTTCTAACCGAGGTCGAAA | <i>AgeI</i>      |
| M1 <i>SphI</i> -R                                        | CTTGCATGCTCACTTGAACCGTTGCATCT  | <i>SphI</i>      |

**Supplementary Table 3.** The *in vivo* toxicity of KBMA *P. aeruginosa*. Mortality of C57BL/6J mice after s.c. injection of  $5 \times 10^6$ ,  $5 \times 10^7$ ,  $5 \times 10^8$  or  $5 \times 10^9$  bacteria.

| Strain     | Dose            | Mortality |
|------------|-----------------|-----------|
| OST        | $5 \times 10^6$ | 0/3       |
|            | $5 \times 10^7$ | 3/3       |
| OSTAB      | $5 \times 10^6$ | 0/3       |
|            | $5 \times 10^7$ | 3/3       |
| KBMA OSTAB | $5 \times 10^7$ | 0/3       |
|            | $5 \times 10^8$ | 1/3       |
|            | $5 \times 10^9$ | 3/3       |

**Supplementary Table 4.** Analysis of systemic response by xMAP technology.

| Cytokines (pg/ml) | Mean $\pm$ Std error |                  |                 | Mann-Whitney test |             |             |
|-------------------|----------------------|------------------|-----------------|-------------------|-------------|-------------|
|                   | PBS group            | OST group        | KBMA group      | OST vs PBS        | KBMA vs PBS | OST vs KBMA |
| IL-1 $\alpha$     | 42 $\pm$ 5           | 1842 $\pm$ 333   | 91 $\pm$ 10     | P = 0.0495        | P = 0.0495  | P = 0.0495  |
| IL-1 $\beta$      | 375 $\pm$ 34         | 10691 $\pm$ 2731 | 383 $\pm$ 46    | P = 0.0495        | NS          | P = 0.0495  |
| IL-2              | 28 $\pm$ 3           | 100 $\pm$ 20     | 21 $\pm$ 2      | P = 0.0495        | NS          | P = 0.0495  |
| IL-3              | 12 $\pm$ 1.3         | 43 $\pm$ 3.5     | 9 $\pm$ 1       | P = 0.0495        | NS          | P = 0.0495  |
| IL-5              | 53 $\pm$ 3           | 64 $\pm$ 2       | 53 $\pm$ 4      | P = 0.0495        | NS          | P = 0.0495  |
| IL-6              | 41 $\pm$ 9           | >15000           | 70 $\pm$ 6      | ND                | NS          | ND          |
| Kc                | 77 $\pm$ 4           | >15000           | 258 $\pm$ 8     | ND                | P = 0.0495  | ND          |
| IL-9              | 300 $\pm$ 51         | 1621 $\pm$ 191   | 274 $\pm$ 14    | P = 0.0495        | NS          | P = 0.0495  |
| IL-10             | 219 $\pm$ 15         | 6259 $\pm$ 592   | 270 $\pm$ 19    | P = 0.0495        | P = 0.0495  | P = 0.0495  |
| IL-12p40          | 175 $\pm$ 11         | 5182 $\pm$ 884   | 182 $\pm$ 14    | P = 0.0495        | NS          | P = 0.0495  |
| IL-12p70          | 197 $\pm$ 13         | 607 $\pm$ 22     | 158 $\pm$ 16    | P = 0.0495        | NS          | P = 0.0495  |
| IL-13             | 1138 $\pm$ 80        | 2052 $\pm$ 149   | 1457 $\pm$ 88   | P = 0.0495        | P = 0.0495  | P = 0.0495  |
| IL-17             | 105 $\pm$ 6          | 1621 $\pm$ 528   | 63 $\pm$ 4      | P = 0.0495        | P = 0.0495  | P = 0.0495  |
| Eotaxin           | 970 $\pm$ 109        | 8991 $\pm$ 936   | 1111 $\pm$ 102  | P = 0.0495        | NS          | P = 0.0495  |
| GCS-F             | 156 $\pm$ 12         | >40000           | 8869 $\pm$ 1522 | ND                | P = 0.0495  | ND          |
| GM-CSF            | 125 $\pm$ 11         | 339 $\pm$ 14     | 152 $\pm$ 7     | P = 0.0495        | NS          | P = 0.0495  |
| INF- $\gamma$     | 315 $\pm$ 24         | 1459 $\pm$ 577   | 296 $\pm$ 25    | P = 0.0495        | NS          | P = 0.0495  |
| MCP-1             | 487 $\pm$ 27         | >12000           | 537 $\pm$ 31    | ND                | NS          | ND          |
| MIP-1 $\alpha$    | 36 $\pm$ 2           | 1258 $\pm$ 132   | 60 $\pm$ 7      | P = 0.0495        | P = 0.0495  | P = 0.0495  |
| MIP-1 $\beta$     | 186 $\pm$ 13         | 566 $\pm$ 77     | 172 $\pm$ 16    | P = 0.0495        | NS          | P = 0.0495  |
| RANTES            | 54 $\pm$ 5           | 1255 $\pm$ 124   | 128 $\pm$ 15    | P = 0.0495        | P = 0.0495  | P = 0.0495  |
| TNF- $\alpha$     | 936 $\pm$ 62         | 2154 $\pm$ 582   | 825 $\pm$ 82    | P = 0.0495        | NS          | P = 0.0495  |

Data are expressed as the means  $\pm$  s.d. in pg/ml with n=3. Abbreviations: IL = interleukin; NS = not significant; ND = not determined. P values for the Mann-Whitney U test are represented. Statistical significance is indicated when P < 0.05.
